# Supplementary material for: External validity of docetaxel triplet trials in advanced gastric cancer: are there patients who still benefit?
Source: PubMed Central journal article supplement (PMC7902567; doi:10.1007/s10120-020-01116-x), 2020-09-24
Supplement: 10120_2020_1116_MOESM1_ESM.pdf [file 10120_2020_1116_MOESM1_ESM.pdf]

**Annex Figure 1. Frequentist AFT model for overall survival**

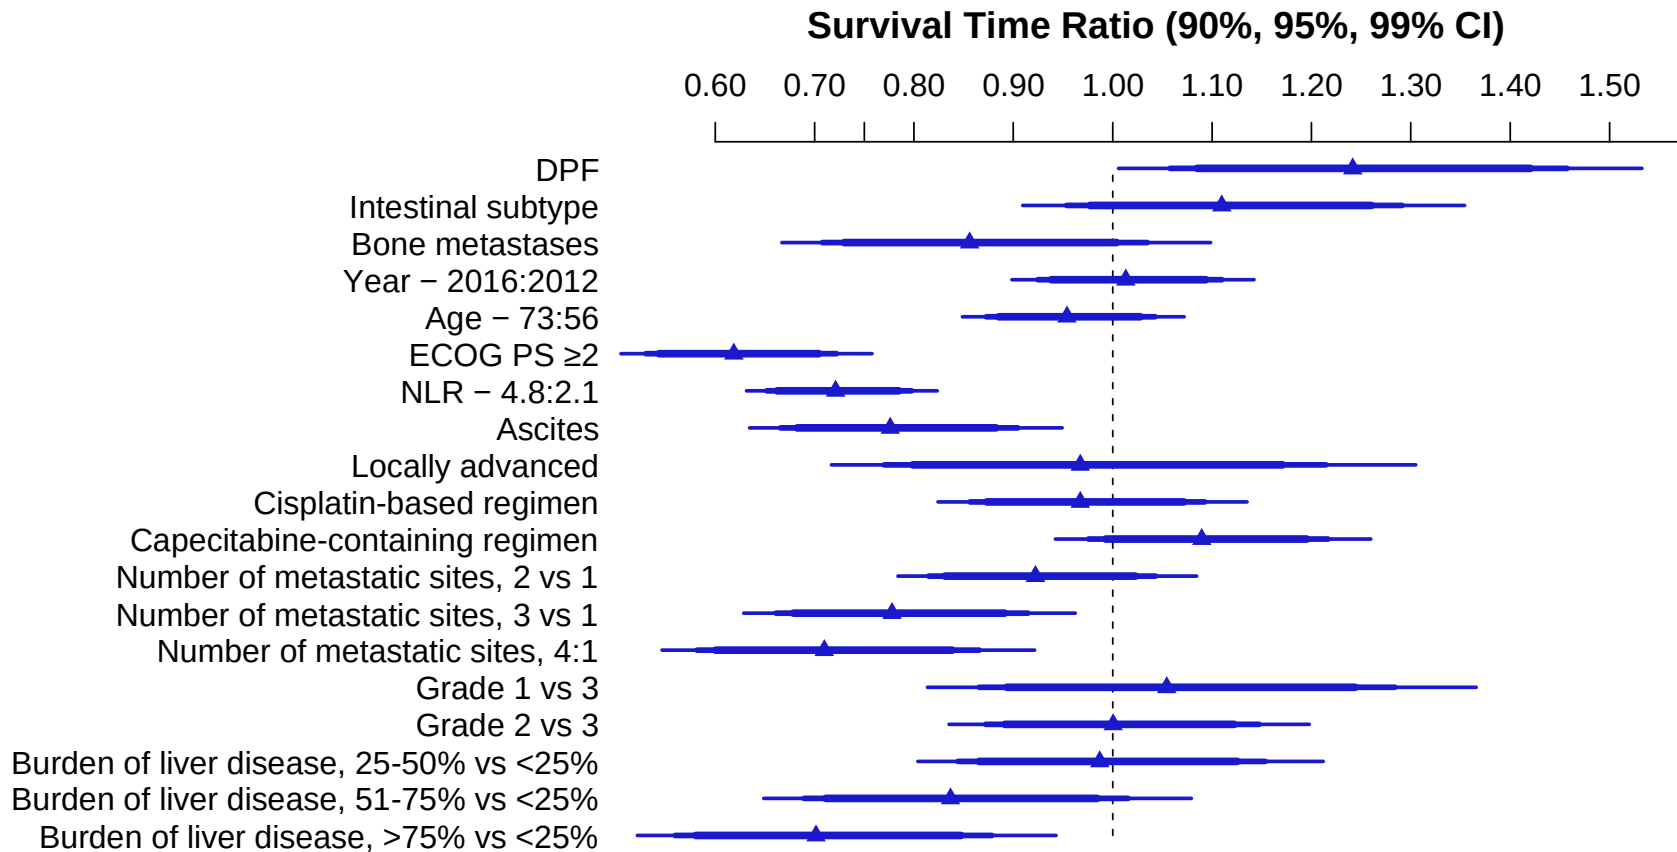

Abbreviations: AFT, accelerated failure time; DPF, docetaxel, platinum, fluoropyrimidine; ECOG-PS, Eastern Cooperative Group Performance Status; NLR, neutrophil-to-lymphocyte, CI, confident interval
