# Supplementary material for: External validity of docetaxel triplet trials in advanced gastric cancer: are there patients who still benefit?
Source: PubMed Central journal article supplement (PMC7902567; doi:10.1007/s10120-020-01116-x), 2020-09-24

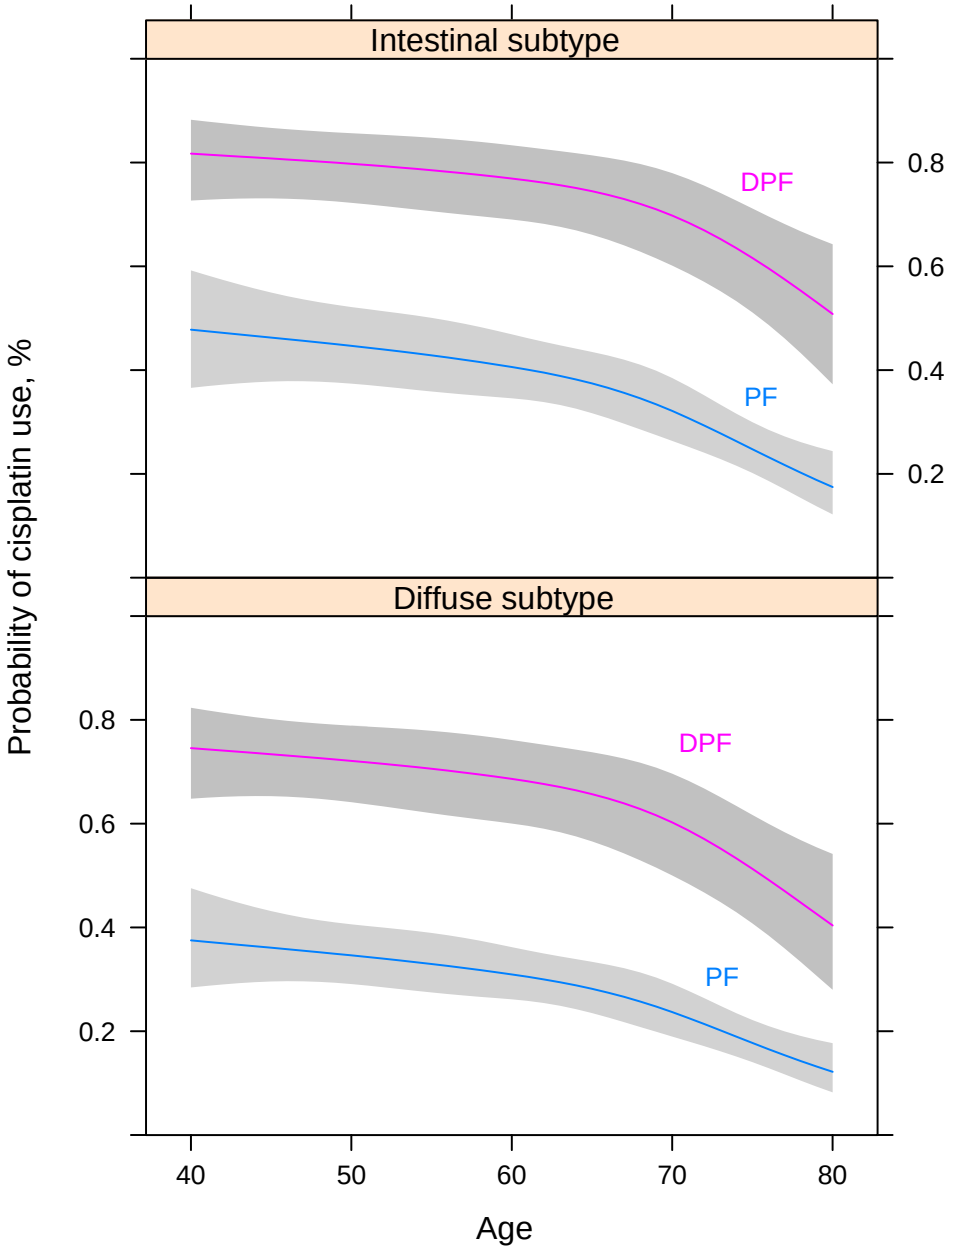

Supplement: 10120_2020_1116_MOESM2_ESM.pdf [file 10120_2020_1116_MOESM2_ESM.pdf]
