# Supplementary material for: External validity of docetaxel triplet trials in advanced gastric cancer: are there patients who still benefit?
Source: PubMed Central journal article supplement (PMC7902567; doi:10.1007/s10120-020-01116-x), 2020-09-24
Supplement: 10120_2020_1116_MOESM4_ESM.pdf [file 10120_2020_1116_MOESM4_ESM.pdf]

2006 2007 2008 2009 2010 2011 2012 2013 2014 2015 2016 2017 2018

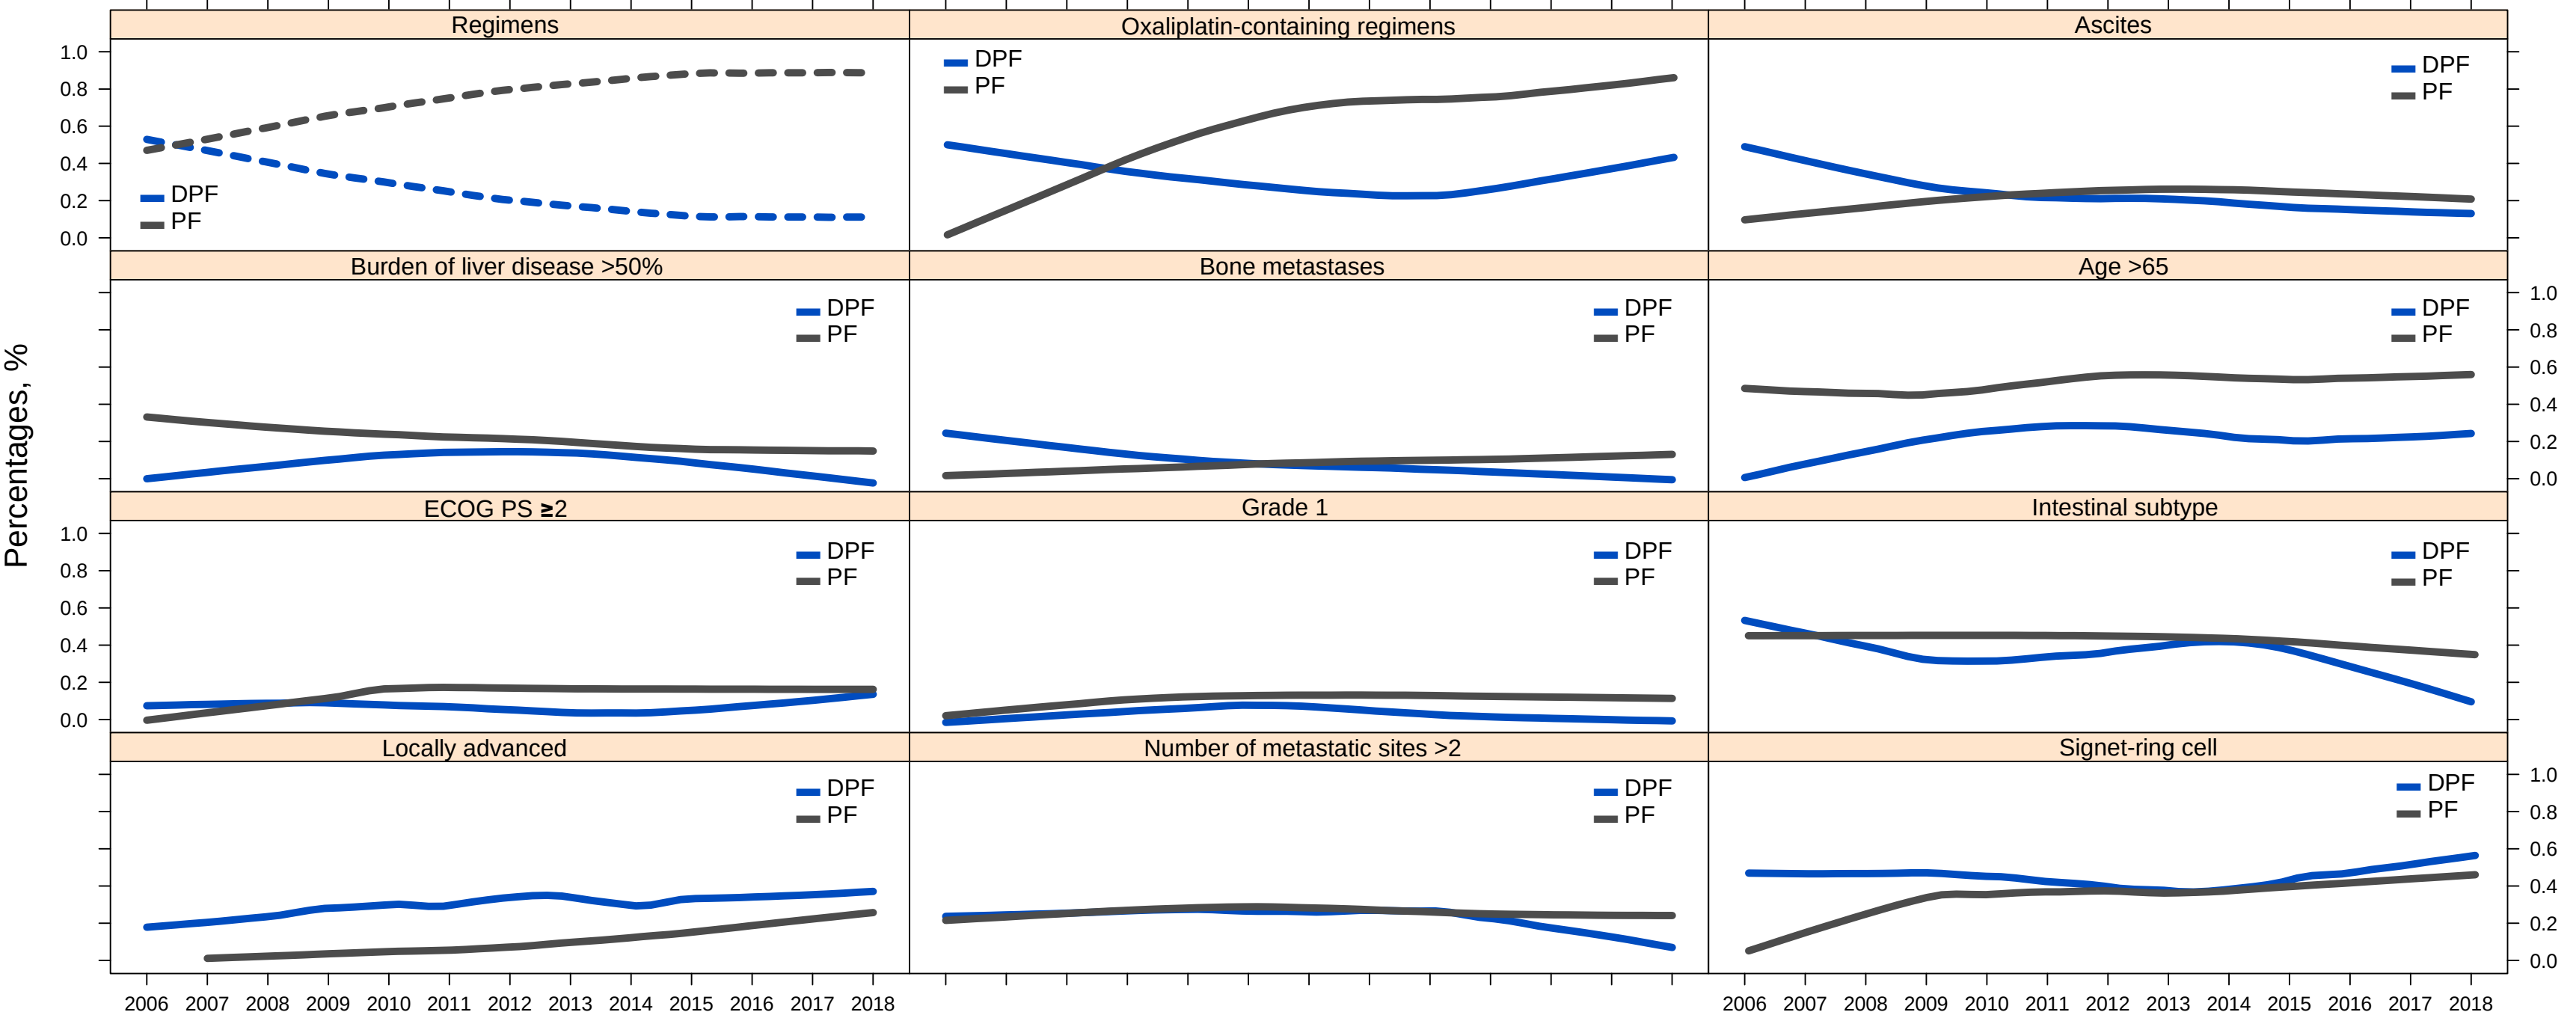

Years
